# Supplementary material for: Systems biology approach to exploring the effect of cyclic stretching on cardiac cell physiology
Source: publisher site journal article supplement (doi:10.18632/aging.103465), 2020-08-05
Supplement: Supplementary file [file aging-v12i16-103465-supplementary-material-SD1.pdf]

## SUPPLEMENTARY TABLES

**Supplementary Table 1. List of primer sequences used for real time PCR analysis in this study.**

| Gene name  | sequence (5'- 3')         |
|------------|---------------------------|
| ID1-F      | GTAAACGTGCTGCTCTACGACATGA |
| ID1-R      | AGCTCCAAGTGAAGGTCCCTGA    |
| ID3-F      | TCATCTCCAACGACAAAAGG      |
| ID3-R      | ACCAGGTTTAGTCTCCAGGAA     |
| GAPDH-F    | TGCACCACCAACTGCTTAGC      |
| GAPDH-R    | GGCATGGACTGTGGTCATGAG     |
| CCL2-F     | GCTCATAGCAGCCACCTTCATTC   |
| CCL2-R     | GGACACTTGCTGCTGGTGATTC    |
| SERPINE1-F | CACAAATCAGACGGCAGCACT     |
| SERPINE1-R | CATCGGGCGTGGTGAAGTC       |

F: Forward primer. R: reverse primer.

Please browse Full Text version to see the data of Supplementary Tables 2

**Supplementary Table 2. The gene expression profile with a 2-fold significance at each time point.**

**Supplementary Table 3. The consistency DEG gene list in the short-term and long term stretch effect in the human cardiomyocytes.**

| Short term    | Long term       |
|---------------|-----------------|
| AKR1B1        | AKR1B1          |
| COL6A3        | ATP6V1G2-DDX39B |
| CTD-2319I12.1 | BNIP3           |
| DDX21         | CCL2            |
| DHCR7         | CTGF            |
| ERRFI1        | CYR61           |
| F3            | DUSP1           |
| FOSL1         | DUSP5           |
| HIST1H2BK     | G0S2            |
| HMGCS1        | HMOX1           |
| ID1           | ID3             |
| ID3           | MMP14           |
| IL11          | MMP2            |
| MAFF          | NTN4            |
| MAFK          | PIM1            |
| ME1           | RCAN1           |
| MOK           | SEMA7A          |
| MRPS6         | SERPINE1        |
| MSMO1         |                 |
| MVD           |                 |
| NQO1          |                 |
| ODC1          |                 |
| RBM3          |                 |
| RRS1          |                 |
| SCD           |                 |
| SDC4          |                 |
| SERPINB2      |                 |
| STC2          |                 |
| TAGLN         |                 |
| TM4SF1        |                 |
